# Supplementary figures and images for: Chemometrics-driven monitoring of cheese ripening: a multimodal spectroscopic and scanning electron microscopy investigation
Source: Royal Society of Chemistry journal article supplement (doi:10.1039/d4ay00609g), 2024-01-01

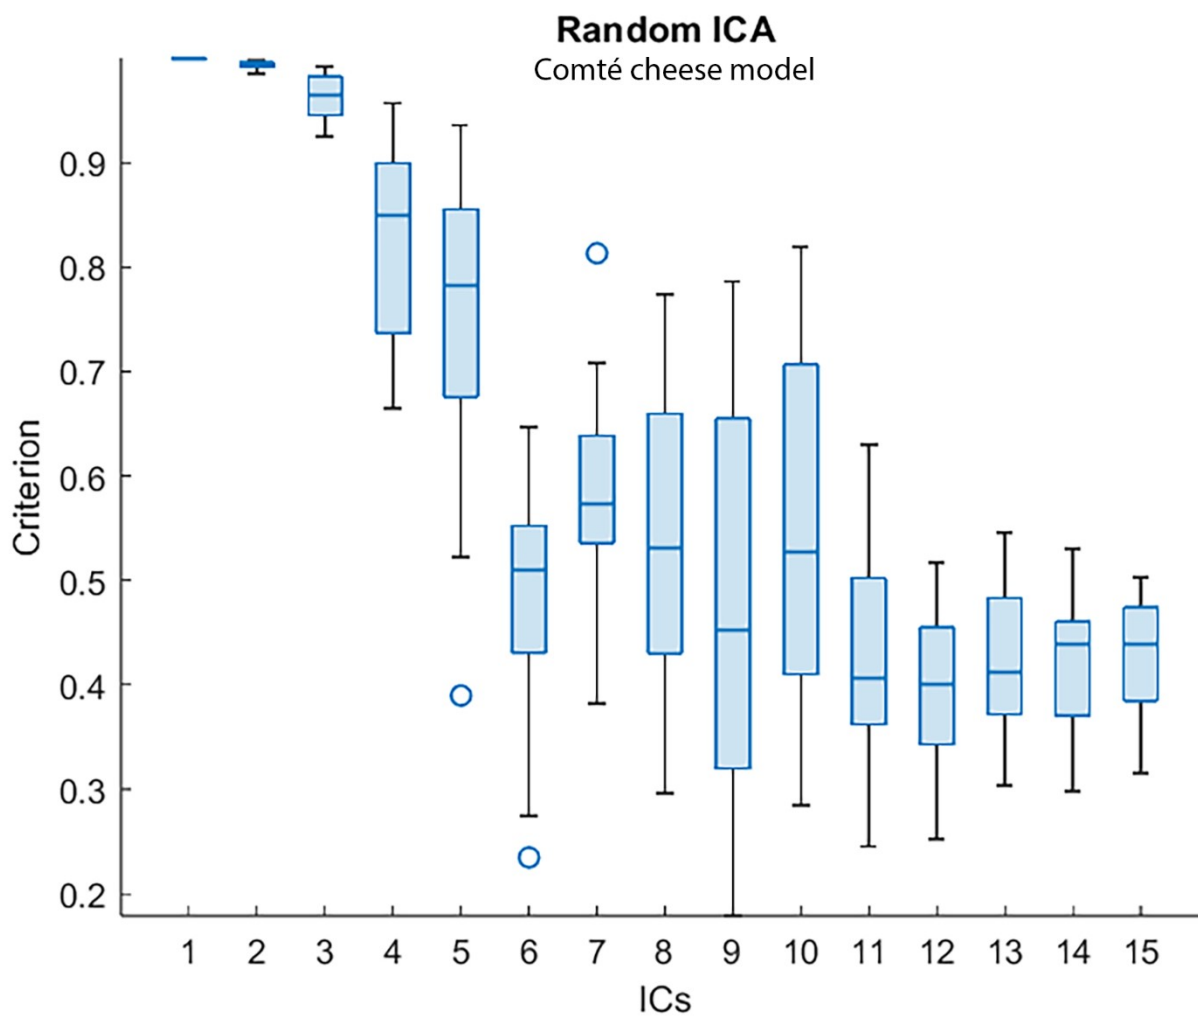

# Random ICA

Cheddar cheese model

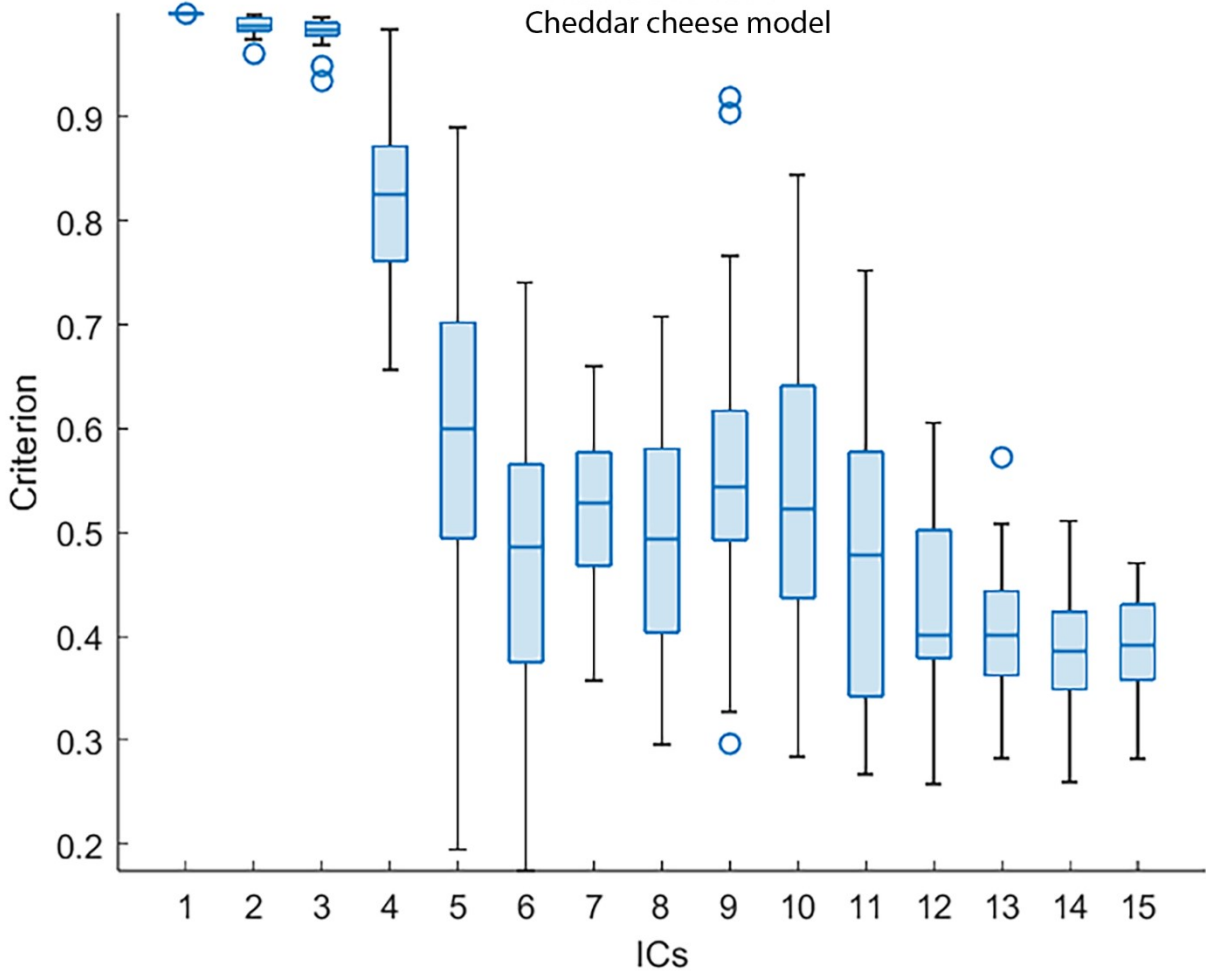

Supplement: d4ay00609g1.pdf [file d4ay00609g1.pdf]
